# Supplementary material for: Early Heat Exposure Effects on Proteomic Changes of the Broiler Liver under Acute Heat Stress
Source: MDPI journal article supplement (doi:10.3390/ani11051338), 2021-05-08
Supplement: s1 [file s1]

**Table S1.** Feed composition of diet.

| <b>Item</b>                                                    | <b>Starter<br/>(1-20 days old)</b> | <b>Finisher<br/>(21-35 days old)</b> |
|----------------------------------------------------------------|------------------------------------|--------------------------------------|
| Crude protein (%)                                              | 20.0                               | 19.0                                 |
| Crude fat (%)                                                  | 4.0                                | 4.0                                  |
| Calcium (%)                                                    | 0.75                               | 0.75                                 |
| Phosphate (%)                                                  | 0.70                               | 0.70                                 |
| Crude fiber (%)                                                | 6.0                                | 5.5                                  |
| Crude ash (%)                                                  | 8.0                                | 8.0                                  |
| DL-methionone + cysteine + DL-methionine hydroxyl analogue (%) | 0.75                               | 0.65                                 |
| Metabolizable energy (Mcal/kg)                                 | 3.00                               | 3.05                                 |

**Table S2.** Primer sequences for real time qPCR.

| Gene name     | NCBI Reference Sequence | F/R | Sequence(5'-3')      | Product size |
|---------------|-------------------------|-----|----------------------|--------------|
| <i>ME1</i>    | NM_204303.1             | F   | GGATAGGGCTGCTTTCAACA | 109          |
|               |                         | R   | GCCACGTCCCTCTGTGTATT |              |
| <i>ACAT1</i>  | NM_001277779.1          | F   | GAACAGTTACGGCTGCCAAT | 113          |
|               |                         | R   | GACTATCCGTGCCAGTGGTT |              |
| <i>ACSS1L</i> | XM_004941792.3          | F   | GGCCTTAATCTGGGAGAAGG | 126          |
|               |                         | R   | ACCCTGTCACCTCGTTTCAC |              |
| <i>COX6C</i>  | NM_001198657.1          | F   | GGACTTCGAAGCCATGAGAG | 87           |
|               |                         | R   | GGGATCTGTGGATCTGGAAA |              |
| <i>HSPD1</i>  | NM_001012916.2          | F   | CCAATAGTCACCGCAAACCT | 131          |
|               |                         | R   | GTCACCAAAACCTGGTGCTT |              |
| <i>COX5A</i>  | XM_003641804.4          | F   | CTCCACTCCAGAGGAACTGG | 106          |
|               |                         | R   | TCTGACTTGAGGCGACTGTG |              |
| <i>DLD</i>    | NM_001030727.2          | F   | GAATCCGCTTGAATCTGGAG | 149          |
|               |                         | R   | TGCAGTGACTTGGTTCTTGC |              |
| <i>PCCA</i>   | XM_025146741.1          | F   | ACTCGAAGAGCAATGGGAGA | 146          |
|               |                         | R   | ACGGGATGTTCAACCTGAAG |              |
| <i>RAB5B</i>  | NM_001199848.1          | F   | CGAGCGAGGAAGAGCTAAGA | 75           |
|               |                         | R   | CGCTGTTATGGAGGTGAGGT |              |
| <i>ACO2</i>   | NM_204188.2             | F   | CCCTGTCCATTGCTGGTACT | 100          |
|               |                         | R   | TCATCTGCATCAGGTGCTTC |              |
| <i>UQCRC1</i> | NM_001005843.1          | F   | GCGTTACGTCCACAATGATG | 135          |
|               |                         | R   | GCTGTTGCAGTCACCAGGTA |              |
| <i>LDHB</i>   | NM_204177.2             | F   | ACAGCGAGAACTGGAAGGAA | 96           |
|               |                         | R   | TAAGACCAATGGCCCAGTTC |              |
| <i>GAPDH</i>  | NM_204305.1             | F   | GACGTGCAGCAGGAACACTA | 112          |
|               |                         | R   | CTTGGACTTTGCCAGAGAGG |              |

**Table S3.** Differentially expressed proteins by acute heat stress compared to control.

| Gi number  | Protein name                                                                             | MW (kDa) | Gene name    | Value |       |
|------------|------------------------------------------------------------------------------------------|----------|--------------|-------|-------|
|            |                                                                                          |          |              | CC    | CH    |
| 46048768   | alpha-enolase                                                                            | 49       | ENO1         | 0.5   | 1.35  |
| 157954047  | heat shock protein HSP 90-alpha                                                          | 83       | HSP90AA1     | 0.78  | 0.98  |
| 61098372   | 60 kDa heat shock protein, mitochondrial precursor                                       | 61       | HSPD1        | 0.93  | 1.1   |
| 45383766   | L-lactate dehydrogenase B chain                                                          | 36       | LDHB         | 0.8   | 1.21  |
| 55742654   | heat shock 70 kDa protein 5                                                              | 72       | HSPA5        | 0.87  | 1.06  |
| 480354971  | acetyl-CoA acetyltransferase, mitochondrial                                              | 44       | ACAT1        | 0.79  | 1.21  |
| 60302804   | long-chain-fatty-acid--CoA ligase 1                                                      | 79       | ACSL1        | 0.96  | 1.15  |
| 71896205   | isocitrate dehydrogenase [NADP], mitochondrial                                           | 51       | IDH2         | 0.83  | 1     |
| 57529492   | 3-ketoacyl-CoA thiolase, mitochondrial                                                   | 42       | ACAA2        | 0.8   | 1.05  |
| 45383738   | aconitate hydratase, mitochondrial                                                       | 87       | ACO2         | 0.95  | 1.23  |
| 971416840  | cytochrome b-c1 complex subunit 1, mitochondrial                                         | 53       | UQCRC1       | 0.98  | 1.27  |
| 45382781   | glutamine synthetase                                                                     | 42       | GLUL         | 0.95  | 1.2   |
| 71897021   | dihydrolipoyl dehydrogenase, mitochondrial                                               | 54       | DLD          | 1.02  | 1.23  |
| 355390334  | delta-1-pyrroline-5-carboxylate dehydrogenase, mitochondrial                             | 61       | ALDH4A1      | 0.87  | 1.42  |
| 478431053  | enoyl-CoA delta isomerase 1, mitochondrial                                               | 40       | ECI1         | 0.76  | 1.03  |
| 533112515  | nucleoside diphosphate kinase, mitochondrial                                             | 21       | NME4         | 0.9   | 1.21  |
| 57530041   | MICOS complex subunit MIC60                                                              | 79       | IMMT         | 0.79  | 2.65  |
| 347543825  | basigin isoform 1 precursor                                                              | 42       | BSG          | 0.91  | 1.07  |
| 307775405  | NADPH--cytochrome P450 reductase                                                         | 77       | POR          | 0.72  | 1.15  |
| 478247029  | protein NipSnap homolog 1                                                                | 30       | NIPSNAP1     | 0.83  | 1.09  |
| 363737486  | cytochrome c oxidase subunit 5A, mitochondrial                                           | 16       | COX5A        | 0.66  | 1.19  |
| 310772257  | cytochrome c oxidase subunit 6C                                                          | 9        | COX6C        | 0.83  | 1.39  |
| 226437575  | NADH dehydrogenase [ubiquinone] iron-sulfur protein 3, mitochondrial                     | 29       | NDUFS3       | 1.02  | 1.47  |
| 71895261   | glutamine amidotransferase-like class 1 domain-containing protein 3A, mitochondrial      | 33       | C1H21ORF33   | 0.88  | 1.13  |
| 770478845  | heat shock protein beta-9                                                                | 21       | HSPB9        | 0.01  | 0.92  |
| 308818127  | 3'(2'),5'-bisphosphate nucleotidase 1                                                    | 33       | BPNT1        | 0.78  | 1.14  |
| 118084650  | propionyl-CoA carboxylase alpha chain, mitochondrial isoform X1                          | 79       | PCCA         | 0.94  | 2.09  |
| 1390124585 | propionyl-CoA carboxylase beta chain, mitochondrial isoform X1                           | 58       | PCCB         | 0.72  | 1.18  |
| 971410893  | prothymosin alpha                                                                        | 12       | PTMA         | 0.31  | 0.9   |
| 513165204  | von Willebrand factor A domain-containing protein 8                                      | 212      | VWA8         | 1     | 2.62  |
| 363734138  | acetyl-coenzyme A synthetase 2-like, mitochondrial isoform X1                            | 58       | ACSS1L       | 0.63  | 4.83  |
| 55741590   | aspartate--tRNA ligase, cytoplasmic                                                      | 57       | DARS         | 0.93  | 1.94  |
| 45382487   | cellular nucleic acid-binding protein                                                    | 15       | CNBP         | 0.59  | 2.04  |
| 71895675   | serine beta-lactamase-like protein LACTB, mitochondrial                                  | 58       | LACTB        | 0.69  | 2.39  |
| 45382483   | pterin-4-alpha-carbinolamine dehydratase                                                 | 12       | PCBD1        | 0.93  | 1.94  |
| 71894957   | NSFL1 cofactor p47                                                                       | 41       | NSFL1C       | 1     | 36.53 |
| 971423246  | dipeptidyl peptidase 2                                                                   | 55       | DPP7         | 7.12  | 40.22 |
| 315434208  | ras-related protein Rab-5B                                                               | 25       | RAB5B        | 1     | 43.1  |
| 821173091  | actin, cytoplasmic 2                                                                     | 42       | ACTG1        | 1.1   | 0.85  |
| 319655768  | fatty acid synthase                                                                      | 275      | FASN         | 1     | 0.41  |
| 71896389   | ATP-citrate synthase                                                                     | 121      | ACLY         | 1.02  | 0.74  |
| 1390108559 | alcohol dehydrogenase 1-like                                                             | 40       | LOC107053269 | 1.08  | 0.89  |
| 971437052  | tubulin alpha-1B chain                                                                   | 49       | TUBA1A1      | 1.3   | 0.76  |
| 45383538   | NADP-dependent malic enzyme                                                              | 64       | ME1          | 1.09  | 0.72  |
| 71895873   | annexin A5                                                                               | 36       | ANXA5        | 1.03  | 0.78  |
| 363736119  | glycerol-3-phosphate dehydrogenase 1-like protein                                        | 38       | GPD1L2       | 1.08  | 0.88  |
| 60302740   | pyruvate dehydrogenase E1 component subunit alpha, somatic form, mitochondrial precursor | 45       | PDHA1        | 1.23  | 0.84  |
| 476007898  | dihydropyrimidinase isoform 1                                                            | 58       | DPYS         | 1.09  | 0.97  |
| 770478821  | myosin-11                                                                                | 228      | MYH11        | 1.31  | 0.71  |
| 874507202  | UTP--glucose-1-phosphate uridylyltransferase                                             | 57       | UGP2         | 1     | 0.64  |
| 56605886   | plastin-2                                                                                | 70       | LCP1         | 1.12  | 0.6   |

|            |                                                                 |     |          |       |      |
|------------|-----------------------------------------------------------------|-----|----------|-------|------|
| 1390106173 | keratin, type I cytoskeletal 18                                 | 41  | KRT18    | 0.96  | 0.66 |
| 45382279   | hydroxymethylglutaryl-CoA synthase, cytoplasmic                 | 58  | HMGCS1   | 1.12  | 0.53 |
| 49169816   | Glutathione S-transferase                                       | 25  | GST      | 1.01  | 0.65 |
| 45382065   | glycine amidinotransferase, mitochondrial                       | 48  | GATM     | 1.17  | 0.7  |
| 971432899  | farnesyl pyrophosphate synthase isoform X1                      | 42  | FDPS     | 1.09  | 0.63 |
| 971401941  | catechol O-methyltransferase domain-containing protein 1        | 29  | COMTD1   | 1.68  | 0.69 |
| 311213923  | fibronectin precursor                                           | 272 | FN1      | 1.45  | 0.86 |
| 45384392   | apolipoprotein A-IV precursor                                   | 41  | apoAIV   | 1.49  | 0.46 |
| 46395491   | PIT54 protein precursor                                         | 55  | PIT54    | 1.35  | 0.9  |
| 57530301   | T-complex protein 1 subunit alpha                               | 60  | TCP1     | 1.09  | 0.65 |
| 45383077   | eukaryotic initiation factor 4A-II                              | 46  | EIF4A2   | 1.28  | 0.79 |
| 71896353   | heterogeneous nuclear ribonucleoprotein M                       | 76  | HNRNPM   | 1.22  | 0.9  |
| 45382029   | annexin A6                                                      | 75  | ANXA6    | 2.36  | 0.64 |
| 113206052  | apolipoprotein B precursor                                      | 523 | APOB     | 2.37  | 0.6  |
| 1390102868 | 40S ribosomal protein S7                                        | 28  | RPS7     | 1.48  | 0.71 |
| 71896825   | plasminogen activator inhibitor 1 RNA-binding protein           | 45  | SERBP1   | 1.14  | 0.76 |
| 45382147   | tudor-interacting repair regulator protein precursor            | 34  | NUDT16L1 | 1.11  | 0.69 |
| 971416599  | acyl-coenzyme A oxidase 2                                       | 75  | ACOX2    | 3.73  | 0.42 |
| 363736280  | sterol 26-hydroxylase, mitochondrial                            | 53  | CYP27A1  | 1.66  | 0.71 |
| 1390066055 | gamma-glutamylaminocyclotransferase isoform X2                  | 19  | GGACT    | 1.66  | 0.71 |
| 45382783   | transgelin                                                      | 27  | -        | 1.43  | 0.79 |
| 57529989   | ribonuclease inhibitor                                          | 50  | RNH1     | 1.45  | 0.55 |
| 71897015   | cytosol aminopeptidase                                          | 58  | LAP3     | 1.29  | 0.62 |
| 1390063329 | glycogen [starch] synthase, liver                               | 81  | GYS2     | 2.04  | 0.98 |
| 1390080620 | AP-2 complex subunit beta isoform X2                            | 106 | AP2B1    | 1.36  | 0.1  |
| 309243067  | 39S ribosomal protein L28, mitochondrial                        | 14  | RPL28    | 1.34  | 0.77 |
| 118094989  | coatamer subunit beta'                                          | 103 | COPB2    | 1.02  | 0.38 |
| 45382597   | cysteine and glycine-rich protein 1                             | 20  | CSRP1    | 1.7   | 0.93 |
| 472824978  | phenazine biosynthesis-like domain-containing protein           | 32  | PBLD     | 1.4   | 0.71 |
| 692314706  | mitochondrial import inner membrane translocase subunit Tim8 A  | 11  | TIMM8A   | 1.79  | 1.07 |
| 45382723   | myristoylated alanine-rich C-kinase substrate                   | 28  | MARCKS   | 1.55  | 0.54 |
| 971415698  | mesencephalic astrocyte-derived neurotrophic factor             | 20  | MANF     | 1.81  | 0.62 |
| 313661410  | 28S ribosomal protein S5, mitochondrial                         | 21  | RPS5     | 1.13  | 0.35 |
| 45384240   | serpin H1 precursor                                             | 46  | SERPINH1 | 2.02  | 0.66 |
| 71894743   | glycerol-3-phosphate phosphatase                                | 33  | PGP      | 1.64  | 0.03 |
| 1390119738 | desmin                                                          | 53  | DES      | 2.11  | 0.5  |
| 82109000   | FK506 binding protein 12                                        | 12  | FKBP12   | 1.2   | 0.56 |
| 642945618  | myosin light chain, embryonic                                   | 21  | MYL4     | 1.79  | 0.61 |
| 45383588   | 60S ribosomal protein L35                                       | 17  | RPL35    | 1.49  | 0.01 |
| 476007876  | proteasome subunit alpha type-6                                 | 27  | PSMA6    | 2.09  | 0.33 |
| 45384278   | 59 kDa 2'-5'-oligoadenylate synthase-like protein               | 54  | OASL     | 40.34 | 1    |
| 42627796   | putative ISG12(2) protein                                       | 10  | ISG12(2) | 1.55  | 0.01 |
| 971425408  | kynurenine formamidase isoform X1                               | 33  | AFMID    | 42.39 | 1    |
| 57525168   | transmembrane emp24 domain-containing protein 2 precursor       | 23  | TMED2    | 1.02  | 0.34 |
| 694016461  | COX17 cytochrome c oxidase copper chaperone                     | 7   | COX17    | 2.1   | 0.71 |
| 57525310   | coiled-coil-helix-coiled-coil-helix domain-containing protein 2 | 15  | CHCHD2   | 1.81  | 0.66 |
| 1390061605 | phytanoyl-CoA dioxygenase, peroxisomal                          | 39  | PHYH     | 37.68 | 1    |

**Table S4.** Relieved expression proteins by early heat exposure under acute heat stress.

| Gi number | Protein name                                                         | MW<br>(kDa) | Gene name    | Value |       |       |
|-----------|----------------------------------------------------------------------|-------------|--------------|-------|-------|-------|
|           |                                                                      |             |              | CC    | CH    | HH    |
| 971401116 | Glutamate dehydrogenase 1, mitochondrial                             | 61          | GLUD1        | 0.89  | 1.08  | 1.01  |
| 448261627 | ATP synthase subunit beta                                            | 57          | ATP5F1B      | 0.88  | 1.07  | 1.01  |
| 61098372  | 60 kDa heat shock protein, mitochondrial precursor                   | 61          | HSPD1        | 0.93  | 1.1   | 0.99  |
| 45383766  | L-lactate dehydrogenase B chain                                      | 36          | LDHB         | 0.8   | 1.21  | 0.99  |
| 480354971 | acetyl-CoA acetyltransferase, mitochondrial                          | 44          | ACAT1        | 0.79  | 1.21  | 0.98  |
| 60302804  | long-chain-fatty-acid--CoA ligase 1                                  | 79          | ACSL1        | 0.96  | 1.15  | 0.85  |
| 45383738  | Aconitate hydratase, mitochondrial                                   | 87          | ACO2         | 0.95  | 1.23  | 0.94  |
| 57524866  | cytochrome b-c1 complex subunit 1, mitochondrial                     | 53          | UQCRC1       | 0.98  | 1.27  | 0.97  |
| 45382781  | Glutamine synthetase                                                 | 42          | GLUL         | 0.95  | 1.2   | 0.91  |
| 71897021  | Dihydrolipoyl dehydrogenase                                          | 54          | DLD          | 1.02  | 1.23  | 0.9   |
| 355390334 | delta-1-pyrroline-5-carboxylate dehydrogenase, mitochondrial         | 61          | ALDH4A1      | 0.87  | 1.42  | 0.95  |
| 513188218 | methylmalonate-semialdehyde dehydrogenase [acylating], mitochondrial | 55          | ALDH6A1      | 0.98  | 1.18  | 0.93  |
| 533112515 | Nucleoside diphosphate kinase                                        | 21          | NME4         | 0.9   | 1.21  | 1.04  |
| 363744581 | Phosphoserine aminotransferase                                       | 41          | PSAT1        | 0.99  | 1.46  | 0.88  |
| 57530041  | MICOS complex subunit MIC60                                          | 79          | IMMT         | 0.79  | 2.65  | 0.87  |
| 363737486 | Cytochrome c oxidase subunit 5A                                      | 16          | COX5A        | 0.66  | 1.19  | 0.98  |
| 310772257 | cytochrome c oxidase subunit 6C                                      | 9           | COX6C        | 0.83  | 1.39  | 0.91  |
| 226437575 | Complex1_30kDa domain-containing protein                             | 29          | NDUFS3       | 1.02  | 1.47  | 0.67  |
| 974005349 | C-factor-like                                                        | 28          | LOC107080643 | 6.93  | 19.22 | 1     |
| 1.39E+09  | Solute carrier family 25 member 11                                   | 25          | SLC25A11     | 0.79  | 1.43  | 0.99  |
| 118084650 | propionyl-CoA carboxylase alpha chain, mitochondrial isoform X1      | 79          | PCCA         | 0.94  | 2.09  | 0.68  |
| 55926141  | apoptosis-inducing factor 1, mitochondrial                           | 75          | AIFM1        | 1     | 2.17  | 0.14  |
| 363734138 | acetyl-coenzyme A synthetase 2-like, mitochondrial isoform X1        | 58          | ACSS1L       | 0.63  | 4.83  | 1.04  |
| 45382487  | Cellular nucleic acid-binding protein                                | 15          | CNBP         | 0.59  | 2.04  | 0.98  |
| 71895675  | serine beta-lactamase-like protein LACTB, mitochondrial              | 58          | LACTB        | 0.69  | 2.39  | 0.05  |
| 45382483  | Pterin-4-alpha-carbinolamine dehydratase                             | 12          | PCBD1        | 0.93  | 1.94  | 0.68  |
| 71894957  | NSFL1 cofactor p47                                                   | 41          | NSFL1C       | 1     | 36.53 | 10.35 |
| 971423246 | dipeptidyl peptidase 2                                               | 55          | DPP7         | 7.12  | 40.22 | 1     |
| 315434208 | Ras-related protein Rab-5B                                           | 25          | RAB5B        | 1     | 43.1  | 16.13 |
| 821173091 | Actin, cytoplasmic 2                                                 | 42          | ACTG1        | 1.1   | 0.85  | 1.04  |
| 762006017 | Alcohol dehydrogenase 1                                              | 40          | ADH1         | 1.08  | 0.89  | 1.02  |
| 45383538  | Malic enzyme                                                         | 64          | ME1          | 1.09  | 0.72  | 1.07  |
| 71895873  | Annexin A5                                                           | 36          | ANXA5        | 1.03  | 0.78  | 0.97  |
| 363736119 | Glycerol-3-phosphate dehydrogenase [NAD(+)]                          | 38          | GPD1L2       | 1.08  | 0.88  | 1.03  |
| 60302740  | Pyruvate dehydrogenase E1 component subunit alpha                    | 45          | PDHA1        | 1.23  | 0.84  | 1.07  |
| 770478821 | Myosin-11                                                            | 228         | MYH11        | 1.31  | 0.71  | 1.01  |
| 874507202 | UTP--glucose-1-phosphate uridylyltransferase                         | 57          | UGP2         | 1     | 0.64  | 1.15  |
| 56605886  | Uncharacterized protein                                              | 70          | LCP1         | 1.12  | 0.6   | 1.11  |
| 1.39E+09  | Keratin 18                                                           | 41          | KRT18        | 0.96  | 0.66  | 1.08  |
| 45382279  | hydroxymethylglutaryl-CoA synthase, cytoplasmic                      | 58          | HMGCS1       | 1.12  | 0.53  | 1.16  |
| 49169816  | Glutathione S-transferase                                            | 25          | GST          | 1.01  | 0.65  | 1.09  |
| 45382065  | Glycine amidinotransferase, mitochondrial                            | 48          | GATM         | 1.17  | 0.7   | 1.15  |
| 971432899 | Farnesyl pyrophosphate synthase                                      | 42          | FDPS         | 1.09  | 0.63  | 1.12  |
| 3645997   | Apolipoprotein AIV                                                   | 41          | apoAIV       | 1.49  | 0.46  | 1.07  |
| 57530301  | T-complex 1                                                          | 60          | TCP1         | 1.09  | 0.65  | 1.2   |
| 102221132 | Apolipoprotein B                                                     | 523         | APOB         | 2.37  | 0.6   | 1.3   |
| 71896825  | plasminogen activator inhibitor 1 RNA-binding protein                | 45          | SERBP1       | 1.14  | 0.76  | 1.04  |
| 45382147  | Tudor-interacting repair regulator protein                           | 34          | NUDT16L1     | 1.11  | 0.69  | 0.98  |

|            |                                                       |     |        |       |      |       |
|------------|-------------------------------------------------------|-----|--------|-------|------|-------|
| 971416599  | acyl-coenzyme A oxidase 2                             | 75  | ACOX2  | 3.73  | 0.42 | 1.76  |
| 57529989   | Ribonuclease/angiogenin inhibitor 1                   | 50  | RNH1   | 1.45  | 0.55 | 1.03  |
| 71897015   | cytosol aminopeptidase                                | 58  | LAP3   | 1.29  | 0.62 | 1.1   |
| 118094989  | Coatomer subunit beta'                                | 103 | COPB2  | 1.02  | 0.38 | 0.94  |
| 313661410  | 28S ribosomal protein S5, mitochondrial               | 21  | MRPS5  | 1.13  | 0.35 | 0.99  |
| 71894743   | Glycerol-3-phosphate phosphatase                      | 33  | PGP    | 1.64  | 0.03 | 0.73  |
| 14211655   | FK506 binding protein 12                              | 12  | FKBP12 | 1.2   | 0.56 | 1.08  |
| 971372403  | Cytoskeleton associated protein 4                     | 57  | CKAP4  | 1.65  | 0.05 | 0.75  |
| 45383588   | 60S ribosomal protein L35                             | 17  | RPL35  | 1.49  | 0.01 | 1.31  |
| 476007876  | proteasome subunit alpha type-6                       | 27  | PSMA6  | 2.09  | 0.33 | 1.32  |
| 45382671   | Phosphoenolpyruvate carboxykinase, cytosolic<br>[GTP] | 70  | PCK1   | 25.49 | 1    | 6.41  |
| 971425408  | Kynurenine formamidase                                | 33  | AFMID  | 42.39 | 1    | 12.57 |
| 57525168   | Transmembrane p24 trafficking protein 2               | 23  | TMED2  | 1.02  | 0.34 | 0.93  |
| 1390061605 | Phytanoyl-CoA 2-hydroxylase                           | 39  | PHYH   | 37.68 | 1    | 10.77 |

---

**Table S5.** GO terms of genes encoded alleviated proteins by early heat exposure under acute heat stress.

| GO Term                                       | %    | P-value | Genes                                                                                                                                                                           |
|-----------------------------------------------|------|---------|---------------------------------------------------------------------------------------------------------------------------------------------------------------------------------|
| Biological process                            |      |         |                                                                                                                                                                                 |
| oxidation-reduction process                   | 22   | 4E-08   | ACAT1, ACO2, ACOX2, ADH1, APOA4, COX5A, DLD, GLUD1, LDHB, ME1, PCK1, PCBD1, UQCRFS1                                                                                             |
| organic acid metabolic process                | 25.4 | 1E-07   | ACAT1, ACO2, ACOX2, LOC423347, ALDH4A1, ALDH6A1, APOA4, AFMID, GLUD1, GLUL, LDHB, ME1, PCK1, PSAT1, PDHA1                                                                       |
| carboxylic acid metabolic process             | 23.7 | 2.3E-07 | ACAT1, ACO2, ACOX2, LOC423347, ALDH4A1, ALDH6A1, APOA4, GLUD1, GLUL, LDHB, ME1, PCK1, PSAT1, PDHA1                                                                              |
| oxoacid metabolic process                     | 23.7 | 2.5E-07 | ACAT1, ACO2, ACOX2, LOC423347, ALDH4A1, ALDH6A1, APOA4, GLUD1, GLUL, LDHB, ME1, PCK1, PSAT1, PDHA1                                                                              |
| alcohol biosynthetic process                  | 10.2 | 9.1E-06 | HMGCS1, APOA3, APOB, FDPS, PCK1, PGP                                                                                                                                            |
| small molecule biosynthetic process           | 15.3 | 0.00006 | HMGCS1, ALDH4A1, APOA4, APOB, FDPS, GLUL, PCK1, PGP, PSAT1                                                                                                                      |
| organic hydroxy compound biosynthetic process | 10.2 | 0.0001  | HMGCS1, APOA4, APOB, FDPS, PCK1, PGP                                                                                                                                            |
| alpha-amino acid metabolic process            | 10.2 | 0.00025 | ALDH4A1, AFMID, GLUD1, GLUL, PCK1, PSAT1                                                                                                                                        |
| alcohol metabolic process                     | 10.2 | 0.00043 | HMGCS1, APOA4, APOB, FDPS, PCK1, PGP                                                                                                                                            |
| cellular amino acid metabolic process         | 10.2 | 0.00085 | ALDH4A1, ALDH6A1, GLUD1, GLUL, PCK1, PSAT1                                                                                                                                      |
| Cellular component                            |      |         |                                                                                                                                                                                 |
| mitochondrion                                 | 42.4 | 6E-10   | ATP5B, NDUFS3, NME4, ACAT1, ACO2, ACOX2, ACSL1, ALDH4A1, ALDH6A1, AIFM1, COX5A, COX6C, DLD, GLUD1, GLUL, GATM, HSPD1, IMMT, LACTB, LDHB, LAP3, MRPS5, PCCA, PDHA1, UQCRFS1      |
| myelin sheath                                 | 18.6 | 6.2E-09 | ATP5B, NDUFS3, ACO2, LOC776816, COX5A, DLD, HSPD1, IMMT, LDHB, TCP1, UQCRFS1                                                                                                    |
| mitochondrial part                            | 22   | 5.3E-06 | ATP5B, NDUFS3, ACAT1, ACO2, AIFM1, COX5A, COX6C, GLUD1, GATM, HSPD1, IMMT, MRPS5, UQCRFS1                                                                                       |
| membrane-bounded vesicle                      | 44.1 | 0.00003 | ATP5B, FKBP1A, RAB5B, UGP2, ACAT1, LOC776816, ALDH6A1, ANXA5, APOA4, APOB, COPB2, COX5A, DLD, DPP7, GATM, HSPD1, LDHB, LAP3, LCP1, MYH11, PCK1, PSAT1, PSMA6, PCBD1, RNH1, TCP1 |
| extracellular exosome                         | 39   | 0.00004 | ATP5B, FKBP1A, UGP2, ACAT1, LOC776816, ALDH6A1, ANXA5, APOA4, APOB, COX5A, DPP7, GATM, HSPD1, LDHB, LAP3, LCP1, MYH11, PCK1, PSAT1, PSMA6, PCBD1, RNH1, TCP1                    |
| extracellular vesicle                         | 39   | 0.00005 | ATP5B, FKBP1A, UGP2, ACAT1, LOC776816, ALDH6A1, ANXA5, APOA4, APOB, COX5A, DPP7, GATM, HSPD1, LDHB, LAP3, LCP1, MYH11, PCK1, PSAT1, PSMA6, PCBD1, RNH1, TCP1                    |
| extracellular organelle                       | 39   | 0.00005 | ATP5B, FKBP1A, UGP2, ACAT1, LOC776816, ALDH6A1, ANXA5, APOA4, APOB, COX5A, DPP7, GATM, HSPD1, LDHB, LAP3, LCP1, MYH11, PCK1, PSAT1, PSMA6, PCBD1, RNH1, TCP1                    |
| mitochondrial inner membrane                  | 15.3 | 0.00006 | ATP5B, NDUFS3, ACAT1, COX5A, COX6C, GATM, HSPD1, IMMT, UQCRFS1                                                                                                                  |
| mitochondrial envelope                        | 16.9 | 0.00012 | ATP5B, NDUFS3, ACAT1, AIFM1, COX5A, COX6C, GATM, HSPD1, IMMT, UQCRFS1                                                                                                           |
| organelle inner membrane                      | 15.3 | 0.00014 | ATP5B, NDUFS3, ACAT1, COX5A, COX6C, GATM, HSPD1, IMMT, UQCRFS1                                                                                                                  |
| Molecular Function                            |      |         |                                                                                                                                                                                 |
| oxidoreductase activity                       | 28.8 | 2.6E-08 | NDUFS3, ACOX2, ADH1, ALDH4A1, ALDH6A1, AIFM1, COX5A, COX6C, DLD, GLUD1, GPD1L2, LDHB, ME1, PCK1, PCBD1, PDHA1, UQCRFS1                                                          |
| catalytic activity                            | 66.1 | 0.00003 | HMGCS1, ATP5B, FKBP1A, NDUFS3, NME4, UGP2, ACAT1, ACO2, ACOX2, ACSL1, LOC423347, ADH1, ALDH4A1, ALDH6A1, AIFM1, AFMID, COX5A, COX6C, DLD, DPP7, FDPS,                           |

|                                                                                                 |     |        |                                                                                                                          |
|-------------------------------------------------------------------------------------------------|-----|--------|--------------------------------------------------------------------------------------------------------------------------|
|                                                                                                 |     |        | GLUD1, GLUL, GSTA3, GPD1L2, GATM, LDHB, LAP3, ME1, MYH11, NUDT16L1, PCK1, PGP, PSAT1, PCCA, PSMA6, PCBD1, PDHA1, UQCRRS1 |
| oxidoreductase activity, acting on the aldehyde or oxo group of donors                          | 6.8 | 0.0007 | ALDH4A1, ALDH6A1, DLD, PDHA1                                                                                             |
| oxidoreductase activity, acting on CH-OH group of donors                                        | 8.5 | 0.0016 | ADH1, GPD1L2, LDHB, ME1, PCK1                                                                                            |
| oxidoreductase activity, acting on NAD(P)H                                                      | 6.8 | 0.0061 | NDUFS3, AIFM1, DLD, PCK1                                                                                                 |
| oxidoreductase activity, acting on the CH-OH group of donors, NAD or NADP as acceptor           | 6.8 | 0.007  | ADH1, GPD1L2, LDHB, ME1                                                                                                  |
| hydrogen ion transmembrane transporter activity                                                 | 6.8 | 0.007  | ATP5B, COX5A, COX6C, UQCRRS1                                                                                             |
| lyase activity                                                                                  | 8.5 | 0.0073 | ACO2, GLUL, ME1, PCK1, PCBD1                                                                                             |
| coenzyme binding                                                                                | 8.5 | 0.0073 | ACOX2, AIFM1, DLD, GPD1L2, ME1                                                                                           |
| oxidoreductase activity, acting on the aldehyde or oxo group of donors, NAD or NADP as acceptor | 5.1 | 0.0084 | ALDH4A1, ALDH6A1, DLD                                                                                                    |

---



**Table S6.** KEGG pathways of genes encoded differentially expressed proteins by acute heat stress.

| <b>Term</b>                                | <b>p-value</b> | <b>%<br/>associated genes</b> | <b>genes</b>                                          |
|--------------------------------------------|----------------|-------------------------------|-------------------------------------------------------|
| Citrate cycle (TCA cycle)                  | < 0.001        | 17.86                         | <i>ACLY, ACO2, DLD, IDH2, PDHA1</i>                   |
| Terpenoid backbone biosynthesis            | 0.001          | 15.79                         | <i>ACAT1, FDPS, HMGCS1</i>                            |
| PPAR signaling pathway                     | < 0.001        | 7.94                          | <i>ACOX2, ACSL1, CYP27A1, HMGCS1, ME1</i>             |
| Peroxisome                                 | 0.01           | 5.06                          | <i>ACOX2, ACSL1, IDH2, PHYH</i>                       |
| Fatty acid degradation                     | < 0.001        | 14.71                         | <i>ACAA2, ACAT1, ACSL1, ADH1C, ECI1</i>               |
| Arginine and proline metabolism            | 0.011          | 7.14                          | <i>ALDH4A1, GATM, LAP3</i>                            |
| Oxidative phosphorylation                  | 0.008          | 4.31                          | <i>COX17, COX5A, COX6C, NDUFS3, UQCRC1</i>            |
| Cardiac muscle contraction                 | 0.006          | 5.71                          | <i>COX5A, COX6C, MYL4, UQCRC1</i>                     |
| Glycolysis / Gluconeogenesis               | < 0.001        | 9.62                          | <i>ADH1C, DLD, ENO1, LDHB, PDHA1</i>                  |
| Valine, leucine and isoleucine degradation | < 0.001        | 13.64                         | <i>ACAA2, ACAT1, DLD, HMGCS1, PCCA, PCCB</i>          |
| Tryptophan metabolism                      | 0.007          | 8.11                          | <i>ACAT1, AFMID, DLD</i>                              |
| Pyruvate metabolism                        | < 0.001        | 15.63                         | <i>ACAT1, DLD, LDHB, ME1, PDHA1</i>                   |
| Glyoxylate and dicarboxylate metabolism    | < 0.001        | 25.81                         | <i>ACAT1, ACO2, AFMID, DLD, GLUL, PCCA, PCCB, PGP</i> |
| Propanoate metabolism                      | < 0.001        | 15.63                         | <i>ACAT1, DLD, LDHB, PCCA, PCCB</i>                   |

Bold type genes showed that significantly changed by acute heat stress compared to control but alleviated by early heat exposure.
